# Supplementary material for: Evaluating the feasibility of modern external beam radiotherapy as an alternative approach to brachytherapy in endometrial cancer treatment: A systematic review
Source: PubMed Central journal article supplement — J Contemp Brachytherapy. 2024 Nov 14;16(5):383–9. doi: 10.5114/jcb.2024.145274 (PMC11664793; doi:10.5114/jcb.2024.145274), 2024-11-14
Supplement: JCB-16-55199-s001.pdf [file JCB-16-55199-s001.pdf]

## Supplementary materials

This appendix is provided for additional information about the authors' work.

### Supplementary Material 1.

Search strategies

1. [(vaginal cuff) OR (vaginal vault)] AND boost OR (external beam radiotherapy boost) AND (endometrial neoplasm OR endometrial cancer)
2. (external beam radiotherapy boost) AND (endometrial neoplasm OR endometrial cancer) NOT brachytherapy
3. (endometrial cancer OR endometrial neoplasm) AND (external beam boost OR stereotactic body radiotherapy OR SBRT OR SABR OR volumetric-modulated arc therapy OR VMAT OR helical tomotherapy)

**Supplementary Table 1.** Planning studies on the comparison between external beam radiotherapy and brachytherapy in endometrial cancer

| Author, year [Ref.]                 | Setting             | No. of pts. | EBRT technique | Boost timing | Vaginal applicator | Comparisons          | RT pelvic total dose (Gy) | RT boost total dose (Gy) | RT dose to the tumor or VC (Gy) | RT dose/fraction (Gy)                                                                    | PTV |
|-------------------------------------|---------------------|-------------|----------------|--------------|--------------------|----------------------|---------------------------|--------------------------|---------------------------------|------------------------------------------------------------------------------------------|-----|
| Aydogan <i>et al.</i> , 2006 [9]    | A VC                | 10          | IMRT           | No boost     | Vaginal cylinder   | HDR-BRT              | No RT                     | 21                       | 7 (1/week)                      | Upper 4 cm vagina (prescription point at cylinder surface or 5 mm from cylinder surface) |     |
| Grelewicz <i>et al.</i> , 2018 [14] | A PNI + boost on VC | 4           | IMRT/VMAT      | Seq.         | Vaginal cylinder   | HDR-BRT 6 Gy x 3 fx. | 45/25 fx.                 | 15                       | 5                               | 5 mm from cylinder surface (5 cm length)                                                 |     |
| Yildirim <i>et al.</i> , 2019 [16]  | A VC                | 12          | VMAT (HT)/SBRT | No boost     | Vaginal cylinder   | HDR-BRT              | No RT                     | 25                       | 5                               | 5 mm from cylinder surface                                                               |     |
| Cilla <i>et al.</i> , 2020 [15]     | A VC                | 8           | VMAT/SBRT      | No boost     | Vaginal cylinder   | HDR-BRT              | N.R.                      | 30                       | 6                               | CTV (5 mm from cylinder surface) + 3 mm                                                  |     |

A – adjuvant, CTV – clinical target volume, EBRT – external beam radiotherapy, fx. – fractions, Gy – Gray, HDR-BRT – high-dose-rate brachytherapy, HT – helical tomotherapy, IMRT – intensity-modulated radiotherapy, N.R. – not reported, pts. – patients, PTV – planning target volume, R – radical, RT – radiotherapy, Seq. – sequential, SIB – simultaneous integrated boost, VC – vaginal cuff, VMAT – volumetric modulated arc therapy, PNI – prophylactic nodal irradiation on the pelvis, \* Prescribed at CTV (PTV was covered by 21 Gy in 4 fractions)

**Supplementary Table 2.** Clinical studies on the use of external beam radiotherapy instead of brachytherapy in endometrial cancer

| Authors, year [Ref.]              | Study design             | No. of pts. | Stage     | RT boost technique | Boost timing | Vaginal applicator | Comparisons                            | RT pelvic total dose (Gy) | RT boost total dose (Gy)    | RT dose/fraction (Gy)   | PTV                           | Clinical outcomes                 | Acute toxicity                                                          | Quality of evidence (grade) |
|-----------------------------------|--------------------------|-------------|-----------|--------------------|--------------|--------------------|----------------------------------------|---------------------------|-----------------------------|-------------------------|-------------------------------|-----------------------------------|-------------------------------------------------------------------------|-----------------------------|
| Demiral <i>et al.</i> , 2013 [10] | Prospective              | 18          | IB-IIIIC1 | VMAT               | Seq.         | Vaginal cylinder   | None                                   | 45/25 fx.                 | 18                          | 6 (1/week)              | CTV (upper 2/3 vagina) + 5 mm | 2-year LC: 100%                   | GI G1: 44.4%<br>GI G2: 33.3%<br>GU G1: 38.8%<br>GU G2: 22.2%            | Very low                    |
| Macchia <i>et al.</i> , 2014 [12] | Prospective              | 30          | IA-IIIIC2 | VMAT               | SIB          | None               | 3D sequential boost in a control group | 45/25 fx.                 | 55                          | Pelvis: 1.8 VC: 2.2     | CTV (upper 2/3 vagina) + 8 mm | N.R.                              | GI G1: 50%<br>GI G2: 16.7%<br>GU G1: 56.7%<br>GU G2: 6.7%               | Very low                    |
| Alongi <i>et al.</i> , 2015 [11]  | Prospective              | 50          | IB1-IIIIC | VMAT               | SIB          | Vaginal probe      | None                                   | 54/30 fx.                 | 66                          | Pelvis: 1.8 VC: 2.2     | CTV (upper 2/3 vagina) + 5 mm | 2-year OS: 96%<br>2-year LC: 100% | GI G1: 52%<br>GI G2: 36%<br>GU G1: 42%<br>GU G2: 48%                    | Low                         |
| Macchia <i>et al.</i> , 2016 [13] | Prospective (phase I-II) | 70          | IA-IIIIC2 | VMAT               | SIB          | None               | None (dose escalation study)           | 45/25 fx.                 | I level: 55<br>II level: 60 | Pelvis: 1.8 VC: 2.2/2.4 | CTV (upper 2/3 vagina) + 8 mm | 3-year DFS: 81.3%                 | G3: 0.0%*,<br>2.8%<br>GI G2: 17.1%*<br>28.6%<br>GU G2: 11.4%*,<br>28.6% | Low                         |

CTV – clinical target volume, fx. – fractions, Gy – Gray, IMRT – intensity-modulated radiotherapy, LRC – loco-regional recurrence, N.A. – not applicable, N.R. – not reported, OS – overall survival, PFS – progression-free survival, Pts. – patients, PTV – planning target volume, RT – radiotherapy, Seq. – sequential, SBRT – stereotactic body radiotherapy, SIB – simultaneous integrated boost, VC – vaginal cuff, VMAT – volumetric modulated arc therapy, \* At 55 Gy / At 60 Gy
